# Supplementary material for: Updating the Breeding Philosophy of Wheat to Fusarium Head Blight (FHB): Resistance Components, QTL Identification, and Phenotyping—A Review
Source: PubMed Central journal article supplement (PMC7761804; doi:10.3390/plants9121702), 2020-12-03
Supplement: plants-09-01702-s001.pdf [file plants-09-01702-s001.pdf]

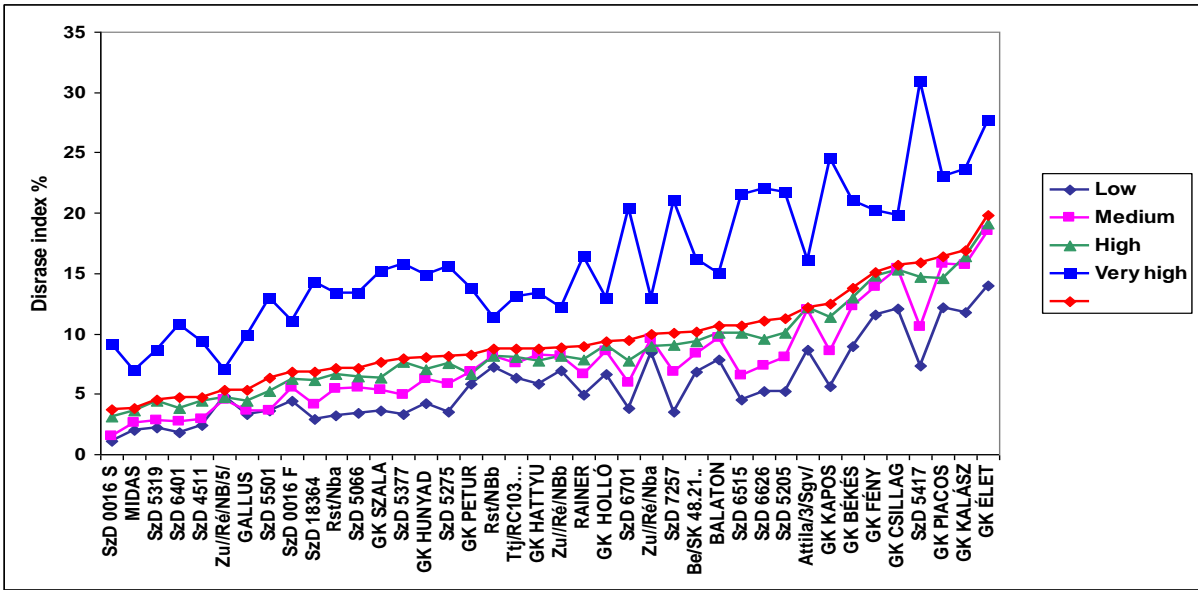

Suppl. Figure 1. Disease index data (%) in the methodical test for inoculation methods across years and methods according to epidemic severities, 2009-2012. [26]

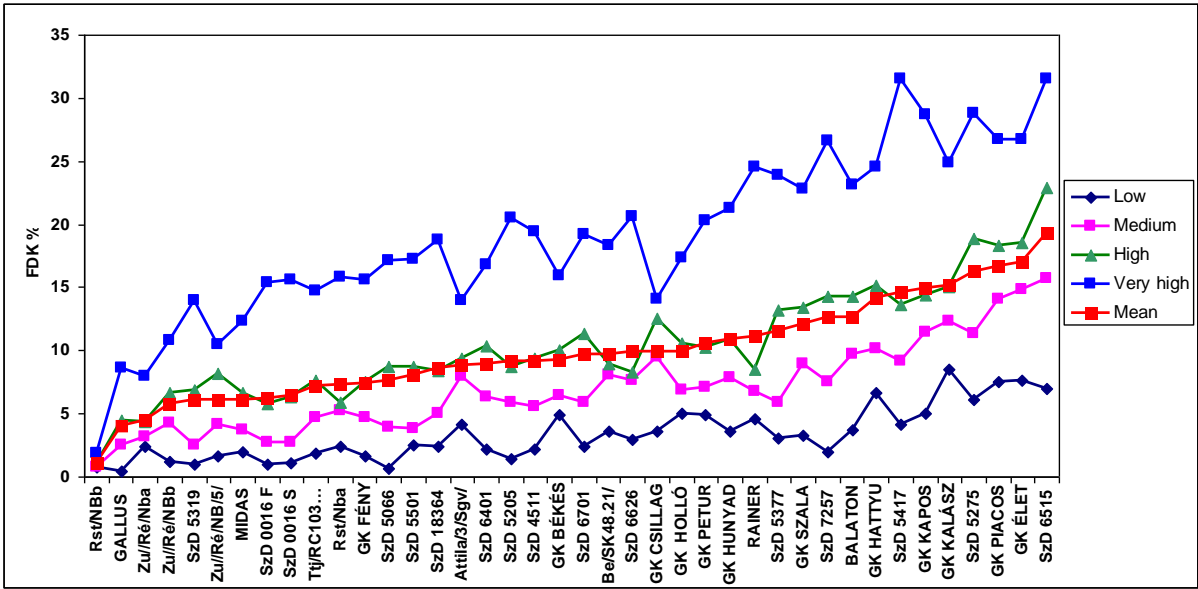

Suppl. Figure 2. FDK data (%) in the methodical test for inoculation methods across years and methods according to epidemic severities, 2009-2012. [26]
